# Supplementary material for: Modular structure of brain functional networks: breaking the resolution limit by Surprise
Source: Sci Rep. 2016 Jan 14;6:19250. doi: 10.1038/srep19250 (PMC4725862; doi:10.1038/srep19250)
Supplement: Supplementary Information [file srep19250-s1.pdf]

# Modular structure of brain functional networks: breaking the resolution limit by Surprise

Carlo Nicolini, Angelo Bifone

## Supplementary Materials

Table S1: Modularity Coactivation

| Community | Density  | $ E_c $ | $ V_c $ |
|-----------|----------|---------|---------|
| 0         | 0.122457 | 2486    | 202     |
| 1         | 0.311761 | 4167    | 164     |
| 2         | 0.321541 | 4090    | 160     |
| 3         | 0.342825 | 2131    | 112     |

Table S2: Modularity Resting state

| Community | Density  | $ E_c $ | $ V_c $ |
|-----------|----------|---------|---------|
| 0         | 0.154097 | 3545    | 215     |
| 1         | 0.109951 | 1674    | 175     |
| 2         | 0.489336 | 5323    | 148     |
| 3         | 0.671313 | 3323    | 100     |

Table S3: Surprise Coactivation

| Community | Density  | $ E_c $ | $ V_c $ |
|-----------|----------|---------|---------|
| 0         | 0.491261 | 3626    | 122     |
| 1         | 0.482883 | 2948    | 111     |
| 2         | 0.553282 | 1298    | 69      |
| 3         | 0.388811 | 834     | 66      |
| 4         | 0.573077 | 447     | 40      |
| 5         | 0.458128 | 186     | 29      |
| 6         | 0.442029 | 122     | 24      |
| 7         | 0.394737 | 75      | 20      |
| 8         | 0.452632 | 86      | 20      |
| 9         | 0.397661 | 68      | 19      |
| 10        | 0.415205 | 71      | 19      |
| 11        | 0.379085 | 58      | 18      |
| 12        | 0.541667 | 65      | 16      |

Table S4: Surprise Resting State

| Community | Density  | $ E_c $ | $ V_c $ |
|-----------|----------|---------|---------|
| 0         | 0.653183 | 4586    | 119     |
| 1         | 0.755375 | 3162    | 92      |
| 2         | 0.543101 | 2224    | 91      |
| 3         | 0.495277 | 367     | 39      |
| 4         | 0.560317 | 353     | 36      |
| 5         | 0.616756 | 346     | 34      |
| 6         | 0.513228 | 194     | 28      |
| 7         | 0.525362 | 145     | 24      |
| 8         | 0.601307 | 92      | 18      |
| 9         | 0.454545 | 30      | 12      |
| 10        | 0.583333 | 21      | 9       |
| 11        | 0.678571 | 19      | 8       |
| 12        | 0.607143 | 17      | 8       |

Table S5: Abbreviation of brain regions.

| Region    | Abbreviation                            |
|-----------|-----------------------------------------|
| ACG       | Anterior Cingulate Gyrus                |
| CAL       | Calcarine                               |
| CAU       | Caudate                                 |
| CUN       | Cuneus                                  |
| DCG       | Median cingulate and paracingulate gyri |
| FFG       | Fusiform Gyrs                           |
| HES       | Heschl Gyrus                            |
| HIP       | Hippocampus                             |
| IFGoperc  | Inferior Frontal Gyrus, opercular part  |
| IFGtriang | Inferior Frontal Gyrus, triangular part |
| INS       | Insula                                  |
| IOG       | Inferior Occipital Gyrus                |
| IPL       | Inferior Parietal Gyrus                 |
| ITG       | Inferior Temporal Gyrus                 |
| LING      | Lingual Gyrus                           |
| MFG       | Middle Frontal Gyrus                    |
| MOG       | Middle Occipital Gyrus                  |
| MTG       | Middle Temporal Gyrus                   |
| ORBinf    | Inferior Frontal Gyrus, orbital part    |
| ORBmid    | Middle Frontal Gyrus, orbital part      |
| ORBsup    | Superior Frontal Gyrus, orbital part    |
| ORBsupmed | Superior Frontal Gyrus, medial orbital  |
| PAL       | Globus Pallidum                         |
| PCG       | Posterior cingulate Gyrus               |
| PCL       | Paracentra Lobule                       |
| PCUN      | Precuneus                               |
| PHG       | Parahippocampal Gyrus                   |
| PoCG      | Postcentral Gyrus                       |
| PreCG     | Precentral Gyrus                        |
| PUT       | Putamen                                 |
| REC       | Rectus                                  |
| ROL       | Rolandic Operculum                      |
| SFG       | Superior Frontal Gyrus                  |
| SFGmed    | Superior Frontal Gyrus, medial part     |
| SMA       | Supplementary Motor Area                |
| SMG       | Supramarginal Gyrus                     |
| SOG       | Superior Occipital Gyrus                |
| SPG       | Superior Parietal Gyrus                 |
| STG       | Superior Temporal Gyrus                 |
| THA       | Thalamus                                |
| TPOmid    | Temporal Pole, Middle temporal Gyrus    |
| TPOsup    | Temporal Pole, Superior temporal Gyrus  |

**Algorithm 1: Pseudocode of the Surprise maximization algorithm.**

```

FAGSO( $G$ )
1   $S \leftarrow 0 \triangleright$  Initialize Surprise to 0
2   $D \leftarrow \emptyset \triangleright$  Initialize disjoint set forest
3  for each vertex  $v$  in  $V[G]$ 
4      do MAKE-SET( $v$ )
5   $E' \leftarrow \text{SORT-JACCARD}(E) \triangleright$  Sort edges in decreasing order by Jaccard index
6  for each edge  $(u, v) \in E'$ ,  $\triangleright$  Taken in decreasing order by Jaccard index
7      do if FIND-SET( $u$ )  $\neq$  FIND-SET( $v$ )
8          then if SURPRISE( $G, D \cup \{(u, v)\}$ )  $> S$ 
9               $D \leftarrow D \cup \{(u, v)\}$ 
10             UNION( $u, v$ )  $\triangleright$  Merge the communities  $u$  and  $v$  belong
11              $S = \text{SURPRISE}(G, D) \triangleright$  Update current Surprise
12 return  $D$ 

MAKE-SET( $x$ )
1   $p[x] \leftarrow x$ 
2   $\text{rank}[x] \leftarrow 0$ 

LINK( $x, y$ )
1  if  $\text{rank}[x] > \text{rank}[y]$ 
2      then  $p[y] \leftarrow x$ 
3      else  $p[x] \leftarrow y$ 
4          if  $\text{rank}[x] = \text{rank}[y]$ 
5              then  $\text{rank}[y] \leftarrow \text{rank}[y] + 1$ 

UNION( $x, y$ )
1  LINK(FIND-SET( $x$ ), FIND-SET( $y$ ))

FIND-SET( $x$ )
1  if  $x \neq p[x]$ 
2      then  $p[x] \leftarrow \text{FIND-SET}(p[x])$ 
3  return  $p[x]$ 

SURPRISE( $G, D$ )
1   $m_\xi \leftarrow 0 \triangleright$  Number of intracenter edges
2   $p_\xi \leftarrow 0 \triangleright$  Number of intracenter pairs of vertices
3   $m \leftarrow |E[G]| \triangleright$  Number of edges
4   $p \leftarrow \binom{|V[G]|}{2} \triangleright$  Number of pairs of vertices
5  for each  $g$  in CONNECTED-COMPONENTS-SUBGRAPHS( $D, G$ )
6      do  $m_\xi \leftarrow m_\xi + |E[g]|$ 
7           $p_\xi \leftarrow p_\xi + \binom{|V[g]|}{2}$ 
8  return  $-\log_{10} \left( \sum_{i=m_\xi}^m \frac{\binom{p_\xi}{i} \binom{p-p_\xi}{m-i}}{\binom{p}{m}} \right)$ 

```

Table S6: Normalized Mutual Information between partitions of the coactivation network with Newman’s Modularity, Infomap, Reichardt and Bornholdt and Surprise. We used the Fagso algorithm for Surprise maximization, the `igraph` implementation of Infomap, the Brain Connectivity Toolbox implementation for RB (`community_louvain.m` function) and `modularity_und.m` for Modularity. For each method the best solution over 100 repetitions was used to calculate NMI.

| <b>Coactivation</b> |             |             |             |                    |
|---------------------|-------------|-------------|-------------|--------------------|
| <b>NMI</b>          | Modularity  | Surprise    | Infomap     | RB $\gamma = 1.75$ |
| Modularity          | <b>1.00</b> | 0.61        | 0.56        | 0.61               |
| Surprise            | 0.61        | <b>1.00</b> | 0.54        | 0.62               |
| Infomap             | 0.56        | 0.54        | <b>1.00</b> | 0.59               |
| RB $\gamma = 1.75$  | 0.59        | 0.61        | 0.59        | <b>1.00</b>        |

Table S7: Normalized Mutual Information between partitions of the Resting state network with Newman’s Modularity, Infomap, Reichardt and Bornholdt and Surprise. We used the Fagso algorithm for Surprise maximization, the `igraph` implementation of Infomap, the Brain Connectivity Toolbox implementation for RB (`community_louvain.m` function) and `modularity_und.m` for Modularity. For each method the best solution over 100 repetitions was used to calculate NMI.

| <b>Resting State</b> |             |             |             |                    |
|----------------------|-------------|-------------|-------------|--------------------|
| <b>NMI</b>           | Modularity  | Surprise    | Infomap     | RB $\gamma = 1.75$ |
| Modularity           | <b>1.00</b> | 0.52        | 0.70        | 0.66               |
| Surprise             | 0.52        | <b>1.00</b> | 0.53        | 0.58               |
| Infomap              | 0.70        | 0.53        | <b>1.00</b> | 0.68               |
| RB $\gamma = 1.75$   | 0.66        | 0.58        | 0.68        | <b>1.00</b>        |

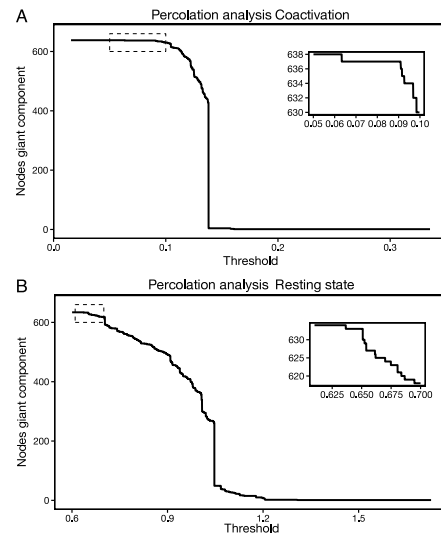

Figure S1: Percolation analysis for the coactivation matrix (A) and resting state matrix (B).

## Resting state

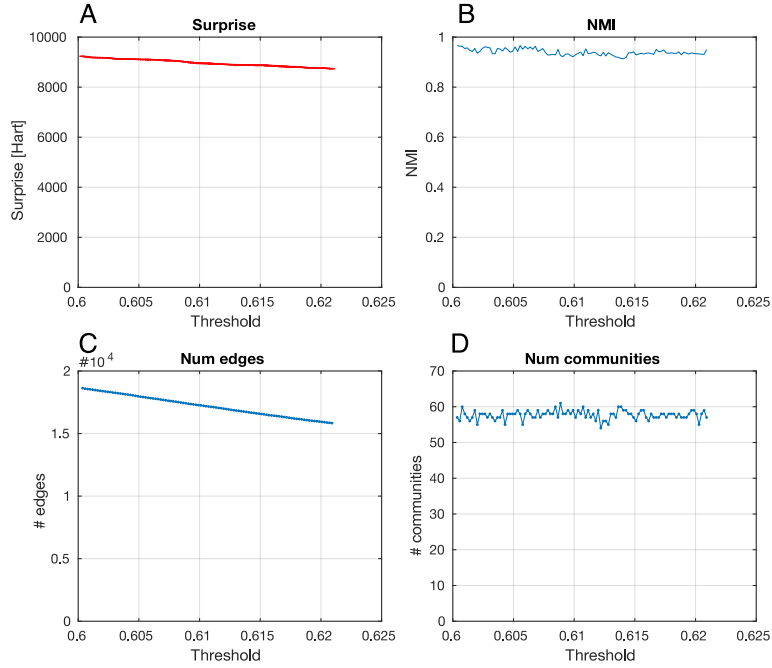

Figure S2: Different Resting State networks were generated varying the binarization threshold in a range that changed the number of edges up to the 15th quantile of the edge weight distribution. This corresponds to threshold ranges of 0.015-0.03 for the co-activation network, and 0.60-0.62 for the resting state network. The resulting networks were partitioned by Surprise maximization. The value of Surprise, the Normalized Mutual Information between the resulting optimal partitions, the number of edges and the number of communities are reported in panel A, B, C and D, respectively.

## Coactivation

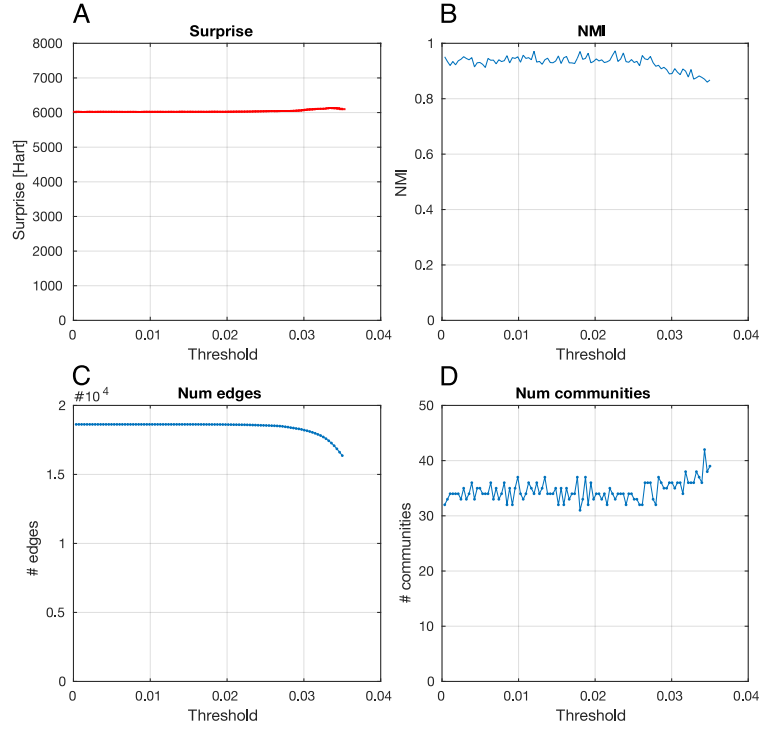

Figure S3: Different coactivation networks were generated varying the binarization threshold in a range that changed the number of edges up to the 15th quantile of the edge weight distribution. This corresponds to threshold ranges of 0.015-0.03 for the co-activation network, and 0.60-0.62 for the resting state network. The resulting networks were partitioned by Surprise maximization. The value of Surprise, the Normalized Mutual Information between the resulting optimal partitions, the number of edges and the number of communities are reported in panel A, B, C and D, respectively.

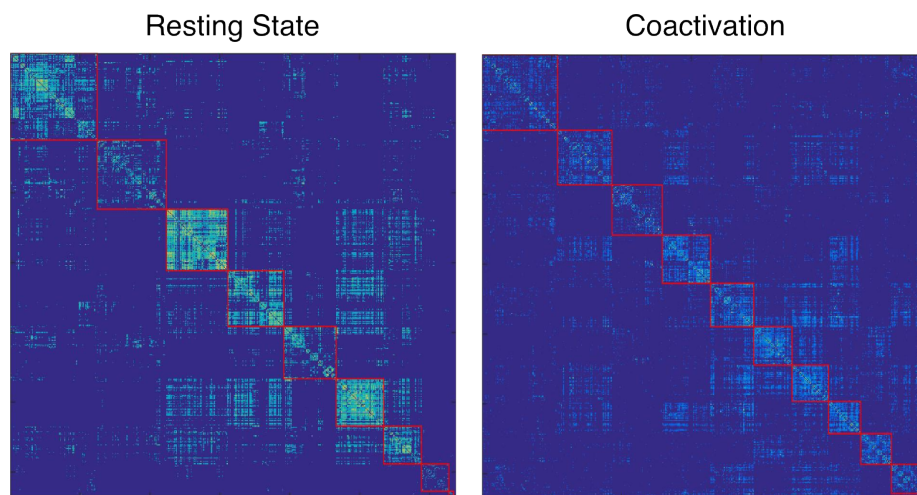

Figure S4: Partitions obtained with multiresolution Modularity (Reichardt and Bornholdt method) for a value of the resolution parameter  $\gamma = 1.75$  for the coactivation and resting state networks. Increasing the resolution parameter improves detection of smaller modules, but breaks up larger ones, thus resulting in relatively homogenous size distributions.

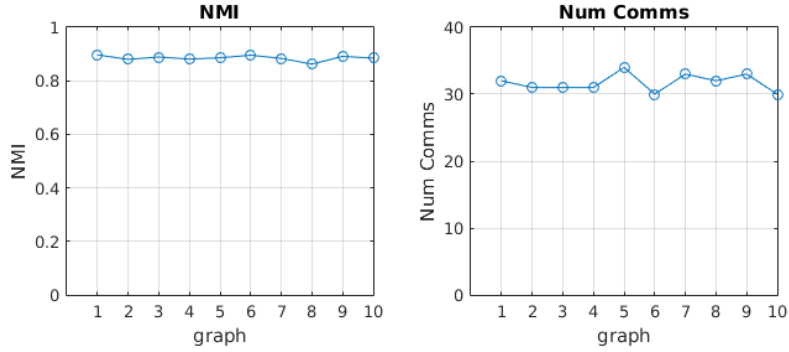

Figure S5: Assessment of the effects of experimental error on the community structure of the resting state network. Ten different graphs were generated by adding noise to the off-diagonal elements of the adjacency matrix prior to the binarization procedure. The amplitude of noise was chosen to randomly perturb 10% of the edges after binarization. Surprise maximization was applied to the resulting graphs. In the left panel, we report the Normalized Mutual Information (NMI) between the optimal partitions of each of the ten perturbed networks and that of the original resting state network. The number of communities retrieved by FAGSO in each of the perturbed networks is reported in the right panel. The graphs show that the partitions of the “noisy” graphs are consistent and similar to those of the unperturbed network, with NMI scores close to 1 and almost constant numbers of communities. These results demonstrate that Surprise maximization can retrieve the network’s community structure even in the presence of substantial noise in the data.
